# Supplementary material for: In situ resolved ligand chirality in preparing a chiral 3D zinc–cyclopentane–tetracarboxylate based coordination polymer
Source: Royal Society of Chemistry journal article supplement (doi:10.1039/c3ce41143e), 2013-01-01
Supplement: c3ce41143e.pdf [file c3ce41143e.pdf]

## Electronic Supplementary information.

### In-Situ resolved ligand chirality in preparing a chiral 3D zinc-cyclopentane-tetracarboxylate based coordination polymer

Yen-Hsiang Liu,\* Chia-Chien Peng, Szu-Hsuan Lee, Po-Hsiu Chien, Pei-Chen Wu

*Department of Chemistry, Fu Jen Catholic University,  
New Taipei City 24205, Taiwan.*

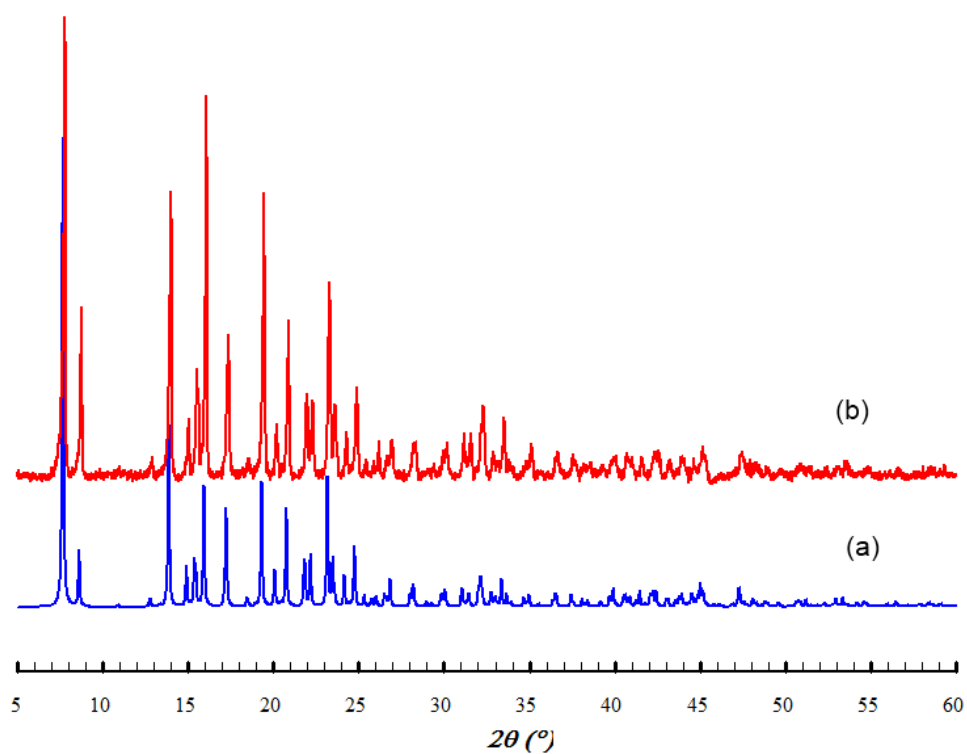

**Fig. S1.** The powder X-ray diffraction diagram: (a) simulated; (b) as-synthesized sample of FJU-5.

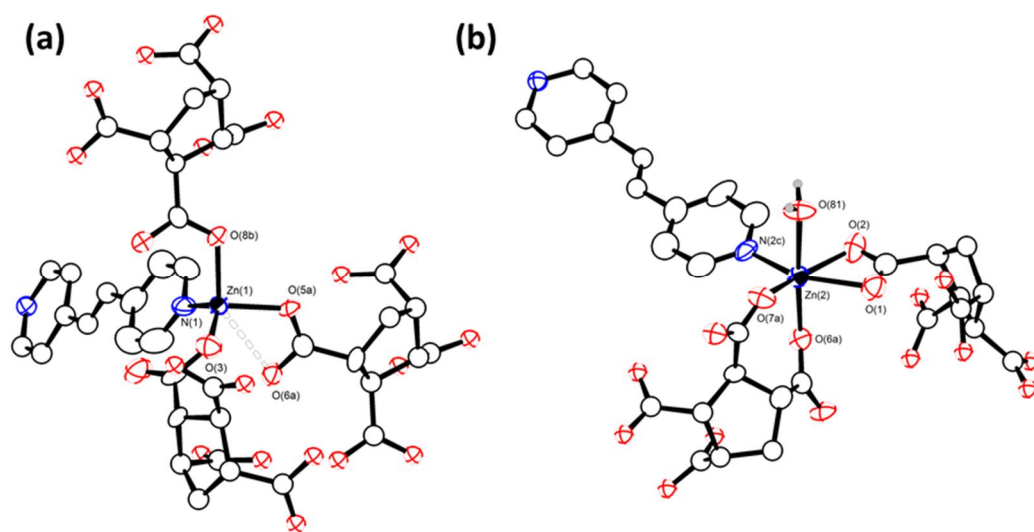

**Fig. S2.** The coordination environments of zinc ions: (a) Zn(1); (b) Zn(2). For clarity, only the H atoms of the coordinated water molecules are shown.

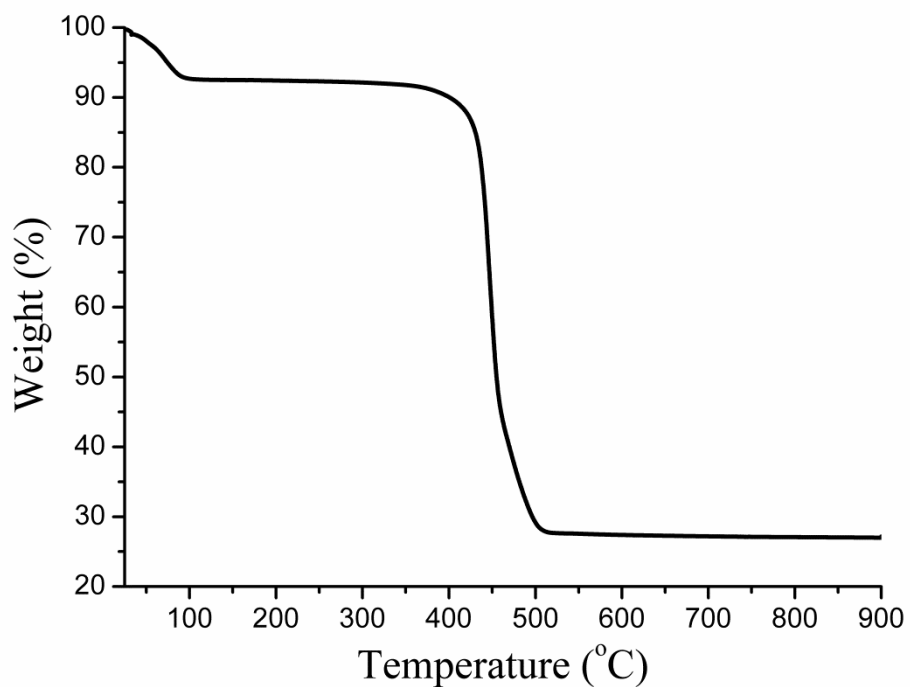

**Fig. S3.** The thermogravimetric analysis diagram of **FJU-5**.

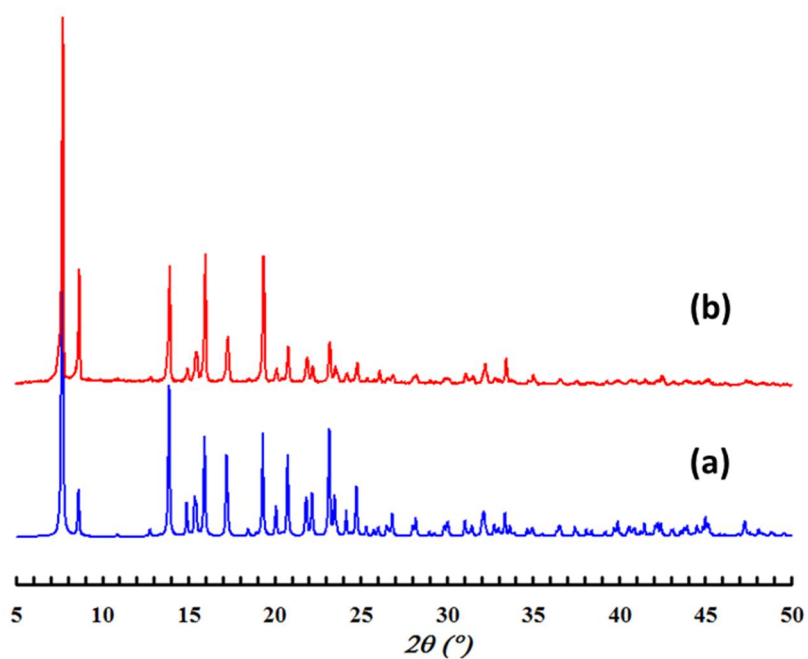

**Fig. S4.** PXRD diagrams of (a) simulated; (b) dehydrated sample of **FJU-5**.

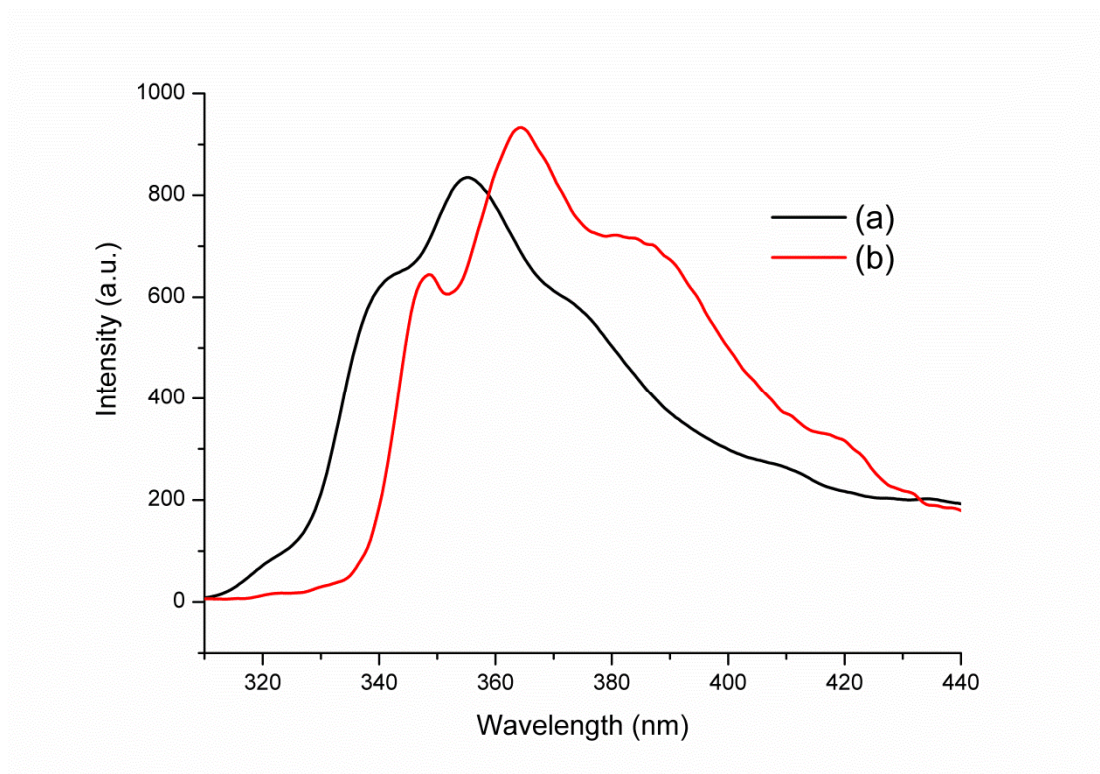

**Fig. S5.** Photoluminescence diagrams of (a) **FJU-5** ( $\lambda_{\text{ex}} = 299$  nm); (b) TBPE ligand ( $\lambda_{\text{ex}} = 207$  nm).
